# Supplementary material
Source: HighWire-hosted journal article supplement (https://fn.bmj.com/content/105/2/222)
Supplement: inline-supplementary-material-1 [file inline-supplementary-material-1.pdf]

Label Area

**POST DELIVERY NEWBORN RESUSCITATION FORM**

Name: \_\_\_\_\_ Birth Date: \_\_\_\_\_ Time: \_\_\_\_\_ Mode of Delivery: \_\_\_\_\_  
 Mother: \_\_\_\_\_ Birth Gestational Age: \_\_\_\_\_ Birth Weight: \_\_\_\_\_  
 Diagnosis: \_\_\_\_\_ Delayed Cord Clamping:  Yes  No Duration: \_\_\_\_\_ seconds

**Initial Resuscitation Steps: Minimum of 1 minute for first 5 minutes of resuscitation.**

| Time                                     | Assessment                                                                                                                                                                                                         | Assessment                                                                                                                                                                                                         | Assessment                                                                                                                                                                                                         | Assessment                                                                                                                                                                                                         | Assessment                                                                                                                                                                                                         |
|------------------------------------------|--------------------------------------------------------------------------------------------------------------------------------------------------------------------------------------------------------------------|--------------------------------------------------------------------------------------------------------------------------------------------------------------------------------------------------------------------|--------------------------------------------------------------------------------------------------------------------------------------------------------------------------------------------------------------------|--------------------------------------------------------------------------------------------------------------------------------------------------------------------------------------------------------------------|--------------------------------------------------------------------------------------------------------------------------------------------------------------------------------------------------------------------|
| <b>Heart Rate</b>                        | <input type="checkbox"/> < 60<br><input type="checkbox"/> 60 - 100<br><input type="checkbox"/> > 100                                                                                                               | <input type="checkbox"/> < 60<br><input type="checkbox"/> 60 - 100<br><input type="checkbox"/> > 100                                                                                                               | <input type="checkbox"/> < 60<br><input type="checkbox"/> 60 - 100<br><input type="checkbox"/> > 100                                                                                                               | <input type="checkbox"/> < 60<br><input type="checkbox"/> 60 - 100<br><input type="checkbox"/> > 100                                                                                                               | <input type="checkbox"/> < 60<br><input type="checkbox"/> 60 - 100<br><input type="checkbox"/> > 100                                                                                                               |
| <b>Respiratory Effort</b>                | <input type="checkbox"/> None<br><input type="checkbox"/> Weak/Irregular<br><input type="checkbox"/> Adequate                                                                                                      |
| <b>P O<sub>x</sub> (SpO<sub>2</sub>)</b> | _____ %                                                                                                                                                                                                            | _____ %                                                                                                                                                                                                            | _____ %                                                                                                                                                                                                            | _____ %                                                                                                                                                                                                            | _____ %                                                                                                                                                                                                            |
| <b>MR Sopa:</b>                          | <input type="checkbox"/> Yes <input type="checkbox"/> No                                                                                                                                                           |
| <b>Respiratory Support</b>               | <input type="checkbox"/> CPAP _____ cmH <sub>2</sub> O<br><input type="checkbox"/> PPV _____ / _____ x<br><input type="checkbox"/> SI _____ cmH <sub>2</sub> O x _____ sec<br><input type="checkbox"/> Other _____ | <input type="checkbox"/> CPAP _____ cmH <sub>2</sub> O<br><input type="checkbox"/> PPV _____ / _____ x<br><input type="checkbox"/> SI _____ cmH <sub>2</sub> O x _____ sec<br><input type="checkbox"/> Other _____ | <input type="checkbox"/> CPAP _____ cmH <sub>2</sub> O<br><input type="checkbox"/> PPV _____ / _____ x<br><input type="checkbox"/> SI _____ cmH <sub>2</sub> O x _____ sec<br><input type="checkbox"/> Other _____ | <input type="checkbox"/> CPAP _____ cmH <sub>2</sub> O<br><input type="checkbox"/> PPV _____ / _____ x<br><input type="checkbox"/> SI _____ cmH <sub>2</sub> O x _____ sec<br><input type="checkbox"/> Other _____ | <input type="checkbox"/> CPAP _____ cmH <sub>2</sub> O<br><input type="checkbox"/> PPV _____ / _____ x<br><input type="checkbox"/> SI _____ cmH <sub>2</sub> O x _____ sec<br><input type="checkbox"/> Other _____ |
| <b>Interface</b>                         | <input type="checkbox"/> Mask <input type="checkbox"/> ETT                                                                                                                                                         |
| <b>FiO<sub>2</sub></b>                   | _____ %                                                                                                                                                                                                            | _____ %                                                                                                                                                                                                            | _____ %                                                                                                                                                                                                            | _____ %                                                                                                                                                                                                            | _____ %                                                                                                                                                                                                            |
| <b>Compressions</b>                      | <input type="checkbox"/> Yes <input type="checkbox"/> No                                                                                                                                                           |
| <b>Comments</b>                          |                                                                                                                                                                                                                    |                                                                                                                                                                                                                    |                                                                                                                                                                                                                    |                                                                                                                                                                                                                    |                                                                                                                                                                                                                    |

**Vital signs: After first 5 minutes of resuscitation**

| Time | HR | Rcp | BP | Temp | P O <sub>x</sub> | FiO <sub>2</sub> | Mode | Settings |
|------|----|-----|----|------|------------------|------------------|------|----------|
|      |    |     |    |      |                  |                  |      |          |
|      |    |     |    |      |                  |                  |      |          |
|      |    |     |    |      |                  |                  |      |          |
|      |    |     |    |      |                  |                  |      |          |
|      |    |     |    |      |                  |                  |      |          |
|      |    |     |    |      |                  |                  |      |          |
|      |    |     |    |      |                  |                  |      |          |
|      |    |     |    |      |                  |                  |      |          |
|      |    |     |    |      |                  |                  |      |          |

| Time | HR | Resp | BP | Temp | P O <sub>x</sub> | FiO <sub>2</sub> | Mode | Settings |
|------|----|------|----|------|------------------|------------------|------|----------|
|      |    |      |    |      |                  |                  |      |          |
|      |    |      |    |      |                  |                  |      |          |
|      |    |      |    |      |                  |                  |      |          |
|      |    |      |    |      |                  |                  |      |          |
|      |    |      |    |      |                  |                  |      |          |
|      |    |      |    |      |                  |                  |      |          |
|      |    |      |    |      |                  |                  |      |          |
|      |    |      |    |      |                  |                  |      |          |
|      |    |      |    |      |                  |                  |      |          |

Additional Notes:  
 \_\_\_\_\_  
 \_\_\_\_\_  
 \_\_\_\_\_

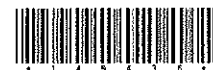

**DO NOT USE UNAPPROVED ABBREVIATIONS**

Label Area

**POST DELIVERY NEWBORN RESUSCITATION FORM**

**Airway Interventions**

|                   | Size | Taped at | Time Successfully Placed | Number of Attempts | Successfully placed by |
|-------------------|------|----------|--------------------------|--------------------|------------------------|
| Endotracheal Tube |      |          |                          |                    |                        |

Indication for intubation:  
 Resuscitation / Bradycardia  Oxygen Requirement  Other \_\_\_\_\_  
 Persistent Apnea/Irregular respirations  Surfactant

**Blood Gases/Labs**

| Time/Site        |  |  |  |
|------------------|--|--|--|
| Vent Settings    |  |  |  |
| PH               |  |  |  |
| PCO <sub>2</sub> |  |  |  |
| PO <sub>2</sub>  |  |  |  |
| Bicarb           |  |  |  |
| Base Excess      |  |  |  |
| H&H              |  |  |  |
| Glucose          |  |  |  |

**Procedures**

|                      | Time | Size | Site | Secured at | Placed by |
|----------------------|------|------|------|------------|-----------|
| Paracentesis         |      |      |      |            |           |
| Thoracentesis        |      |      |      |            |           |
| Chest Tube #1        |      |      |      |            |           |
| Chest Tube #2        |      |      |      |            |           |
| UAC                  |      |      |      |            |           |
| UVC (double lumen)   |      |      |      |            |           |
| Peripheral art stick |      |      |      |            |           |
| Peripheral IV        |      |      |      |            |           |

| Medications | Epinephrine | Normal Saline | PRBCs | Surfactant | Erythromycin | Phytonadione (Vitamin K) |  |  |
|-------------|-------------|---------------|-------|------------|--------------|--------------------------|--|--|
| Dose/Rt     |             |               |       |            |              |                          |  |  |
| Time        |             |               |       |            |              |                          |  |  |
| Dose/Rt     |             |               |       |            |              |                          |  |  |
| Time        |             |               |       |            |              |                          |  |  |
| Dose/Rt     |             |               |       |            |              |                          |  |  |
| Time        |             |               |       |            |              |                          |  |  |

**APGAR Score**

| Sign                       | 1 minute | 5 minutes | 10 minutes | 15 minutes |
|----------------------------|----------|-----------|------------|------------|
| <b>Heart Rate</b>          |          |           |            |            |
| >100                       | 2        |           |            |            |
| <100                       | 1        |           |            |            |
| Absent                     | 0        |           |            |            |
| <b>Respiration</b>         |          |           |            |            |
| Strong Effort              | 2        |           |            |            |
| Weak/Irregular             | 1        |           |            |            |
| Absent                     | 0        |           |            |            |
| <b>Muscle Tone</b>         |          |           |            |            |
| Active Motion              | 2        |           |            |            |
| Strong Flexion             | 1        |           |            |            |
| Limp                       | 0        |           |            |            |
| <b>Reflex/Irritability</b> |          |           |            |            |
| Cry/Active Withdraw        | 2        |           |            |            |
| Grimace                    | 1        |           |            |            |
| No Response                | 0        |           |            |            |
| <b>Color</b>               |          |           |            |            |
| Pink                       | 2        |           |            |            |
| Acrocyanosis               | 1        |           |            |            |
| Pale/Blue                  | 0        |           |            |            |
| <b>Total</b>               |          |           |            |            |

**Thermoregulation**

Neo Wrap  Plastic Wrap on Head  Portable Heat Mattress

**IV Fluids and Infusions**

| Solution/Infusion | Rate | Site of Infusion | Time Started |
|-------------------|------|------------------|--------------|
|                   |      |                  |              |
|                   |      |                  |              |

**RESPONDERS**

| Name | Signature | Time Arrived | Role |
|------|-----------|--------------|------|
|      |           |              |      |
|      |           |              |      |
|      |           |              |      |
|      |           |              |      |
|      |           |              |      |
|      |           |              |      |
|      |           |              |      |
|      |           |              |      |

I was present and supervised the resuscitation. I reviewed the resuscitation record and agree except as noted:

\_\_\_\_\_

Medical Leader Signature

Print Name

Date

Time

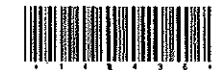

**DO NOT USE UNAPPROVED ABBREVIATIONS**
